# Supplementary material for: DNA Barcode Authentication of Wood Samples of Threatened and Commercial Timber Trees within the Tropical Dry Evergreen Forest of India
Source: PLoS One. 2014 Sep 26;9(9):e107669. doi: 10.1371/journal.pone.0107669 (PMC4178033; doi:10.1371/journal.pone.0107669)
Supplement: Table S3 — Inter-specific divergence between congeneric species pairs for rbcL marker. (XLSX) [file pone.0107669.s005.xlsx]

## Sheet: Sheet 1
Table S3. Inter-specific divergence between congeneric species pairs for rbcL marker
S.No	Name of the Genus	Name of the species	Name of the species	Divergence
1	Annona	Annona squamosa	Annona reticulata	0
2	Bauhinia	Bauhinia racemosa	Bauhinia purpurea	1.16366
3	Cassia	Cassia roxburghii	Cassia fistula	0.330783
4	Delonix	Delonix elata	Delonix regia	0.165016
5	Ixora	Ixora coccinea	Ixora paveta	0.164947
6	Manilkara	Manilkara zapota	Manilkara hexandra	0.165016
7	Phyllanthus	Phyllanthus emblica	Phyllanthus acidus	0.661911
8	Strychnos	Strychnos potatorum	Strychnos nux-vomica	0.330579
9	Ziziphus	Ziziphus xylopyrus	Ziziphus mauritiana	0.496075
10	Diospyros	Diospyros buxifolia	Diospyros ferrea	0.662464
11	Diospyros	Diospyros ferrea	Diospyros chloroxylon	1.49777
12	Diospyros	Diospyros buxifolia	Diospyros chloroxylon	0.828373
13	Terminalia	Terminalia catappa	Terminalia bellirica	0.495867
14	Terminalia	Terminalia bellirica	Terminalia arjuna	0.165016
15	Terminalia	Terminalia catappa	Terminalia arjuna	0.661981
16	Premna	Premna mollissima	Premna tomentosa	0.330237
17	Premna	Premna tomentosa	Premna corymbosa	0.165016
18	Premna	Premna mollissima	Premna corymbosa	0.164947
19	Albizia	Albizia lebbeck	Albizia amara	0.662464
20	Albizia	Albizia saman	Albizia amara	0.995874
21	Albizia	Albizia saman	Albizia lebbeck	0.662464
22	Acacia	Acacia ferruginea	Acacia auriculiformis	0.829412
23	Acacia	Acacia holosericea	Acacia auriculiformis	0
24	Acacia	Acacia holosericea	Acacia ferruginea	0.829412
25	Acacia	Acacia leucophloea	Acacia auriculiformis	1.33201
26	Acacia	Acacia leucophloea	Acacia ferruginea	1.83844
27	Acacia	Acacia leucophloea	Acacia holosericea	1.33201
28	Acacia	Acacia nilotica	Acacia auriculiformis	1.16366
29	Acacia	Acacia nilotica	Acacia ferruginea	1.66866
30	Acacia	Acacia nilotica	Acacia holosericea	1.16366
31	Acacia	Acacia nilotica	Acacia leucophloea	0.165016
32	Acacia	Acacia planiformis	Acacia auriculiformis	1.49945
33	Acacia	Acacia planiformis	Acacia ferruginea	1.33201
34	Acacia	Acacia planiformis	Acacia holosericea	1.49945
35	Acacia	Acacia planiformis	Acacia leucophloea	0.496075
36	Acacia	Acacia planiformis	Acacia nilotica	0.330237
37	Acacia	Acacia chundra	Acacia auriculiformis	0.829412
38	Acacia	Acacia chundra	Acacia ferruginea	0
39	Acacia	Acacia chundra	Acacia holosericea	0.829412
40	Acacia	Acacia chundra	Acacia leucophloea	1.83844
41	Acacia	Acacia chundra	Acacia nilotica	1.66866
42	Acacia	Acacia chundra	Acacia planiformis	1.33201
43	Ficus	Ficus religiosa	Ficus racemosa	0.164947
44	Ficus	Ficus benjamina	Ficus benghalensis	0
45	Ficus	Ficus elastica	Ficus benghalensis	0.164947
46	Ficus	Ficus elastica	Ficus benjamina	0.164947
47	Ficus	Ficus hispida	Ficus benghalensis	0
48	Ficus	Ficus hispida	Ficus benjamina	0
49	Ficus	Ficus hispida	Ficus elastica	0.164947
50	Ficus	Ficus mollis	Ficus benghalensis	0
51	Ficus	Ficus mollis	Ficus benjamina	0
52	Ficus	Ficus mollis	Ficus elastica	0.164947
53	Ficus	Ficus mollis	Ficus hispida	0
54	Ficus	Ficus racemosa	Ficus benghalensis	0
55	Ficus	Ficus racemosa	Ficus benjamina	0
56	Ficus	Ficus racemosa	Ficus elastica	0.164947
57	Ficus	Ficus racemosa	Ficus hispida	0
58	Ficus	Ficus racemosa	Ficus mollis	0
59	Ficus	Ficus religiosa	Ficus benghalensis	0.164947
60	Ficus	Ficus religiosa	Ficus benjamina	0.164947
61	Ficus	Ficus religiosa	Ficus elastica	0.330306
62	Ficus	Ficus religiosa	Ficus hispida	0.164947
63	Ficus	Ficus religiosa	Ficus mollis	0.164947
